# Supplementary material
Source: PubMed Central journal article supplement (PMC3193451)
Supplement: cr2011156x1.pdf [file cr2011156x1.pdf]

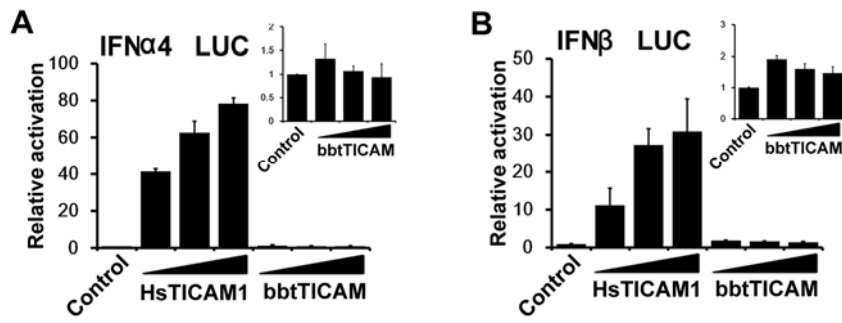

**Figure S1. BbtTICAM has no effect on IFN $\alpha$ 4 and IFN $\beta$  promoters in HEK239T cell-line.** HsTICAM1 (human TICAM1/TRIF) conducted as a positive control. The small panels of the bar graph show the relative activation of luciferase reporter by bbtTICAM.
