# Supplementary material
Source: PubMed Central journal article supplement (PMC3193451)
Supplement: cr2011156x2.pdf [file cr2011156x2.pdf]

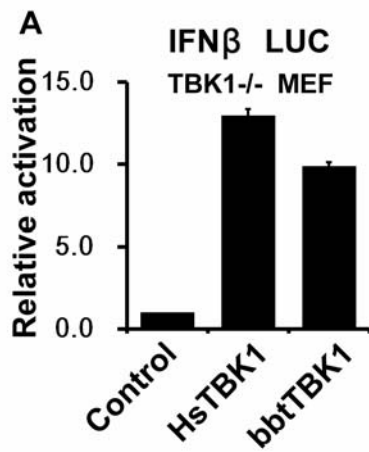

**Figure S2. BbtTBK1 could substitute for human TBK1 in the TBK<sup>-/-</sup> MEF cells.** Results show that bbtTBK1 can induce the production of IFN $\beta$  as HsTBK1 (human TBK1) does, indicating that bbtTBK1 and HsTBK1 are of functional similarity.
