# Supplementary material
Source: PubMed Central journal article supplement (PMC3193451)
Supplement: cr2011156x3.pdf [file cr2011156x3.pdf]

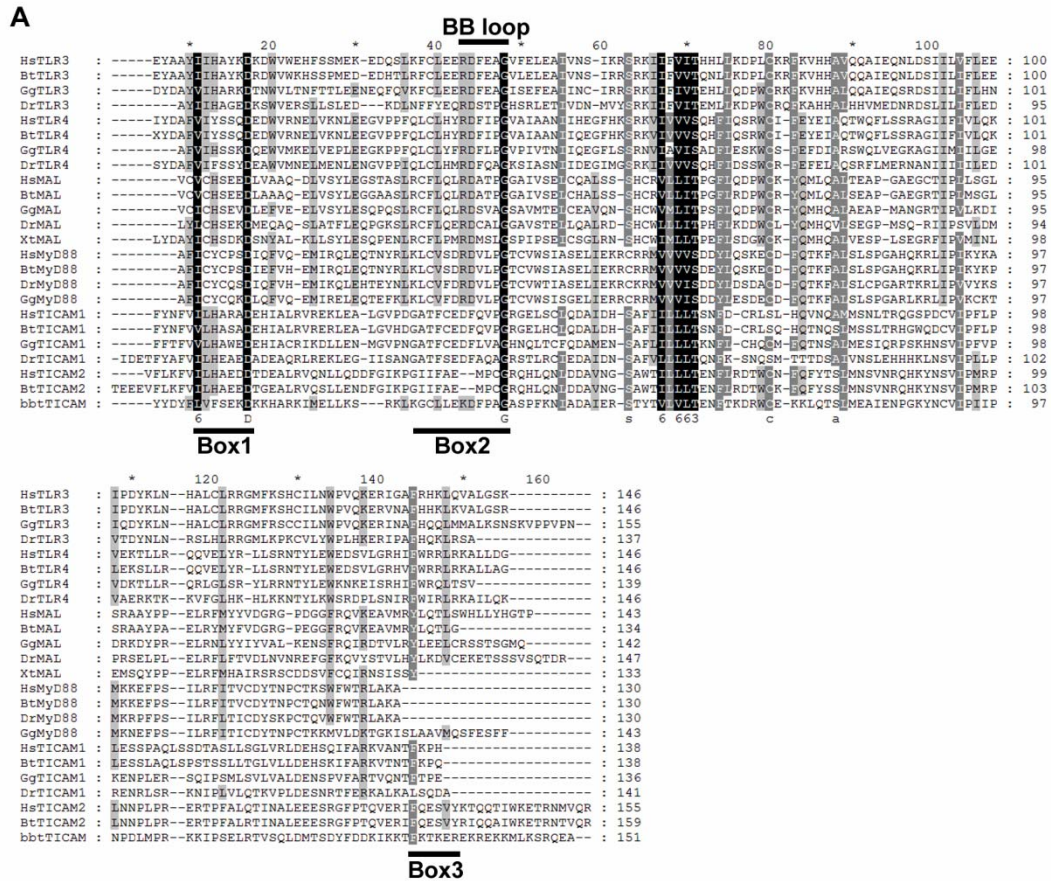

**Figure S3. The conserved three boxes and BB loop in the TIR domains.** Sequence alignment based on TIR domains of TLR3, TLR4, MyD88, MAL, TICAM1, and TICAM2 from mammal, *Xenopus*, chicken, fish, and amphioxus.
