# Supplementary material
Source: PubMed Central journal article supplement (PMC3193451)
Supplement: cr2011156x4.pdf [file cr2011156x4.pdf]

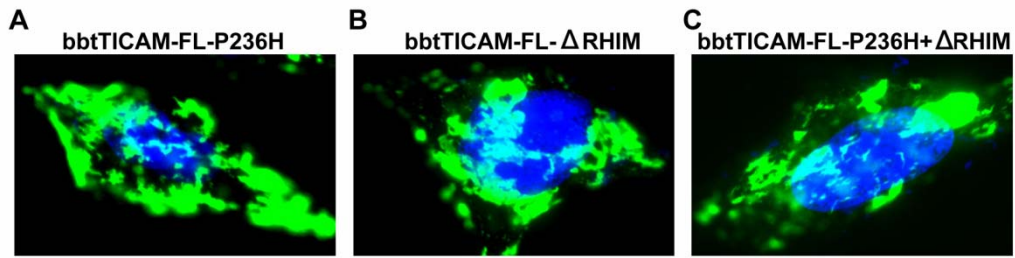

**Figure S4.** The sub-cellular distribution of three site directed mutants: bbtTICAM-FL-P236H, bbtTICAM-FL- $\Delta$ RHIM, and bbtTICAM-FL-P236H+ $\Delta$ RHIM.
