# Supplementary material
Source: PubMed Central journal article supplement (PMC3193451)
Supplement: cr2011156x5.pdf [file cr2011156x5.pdf]

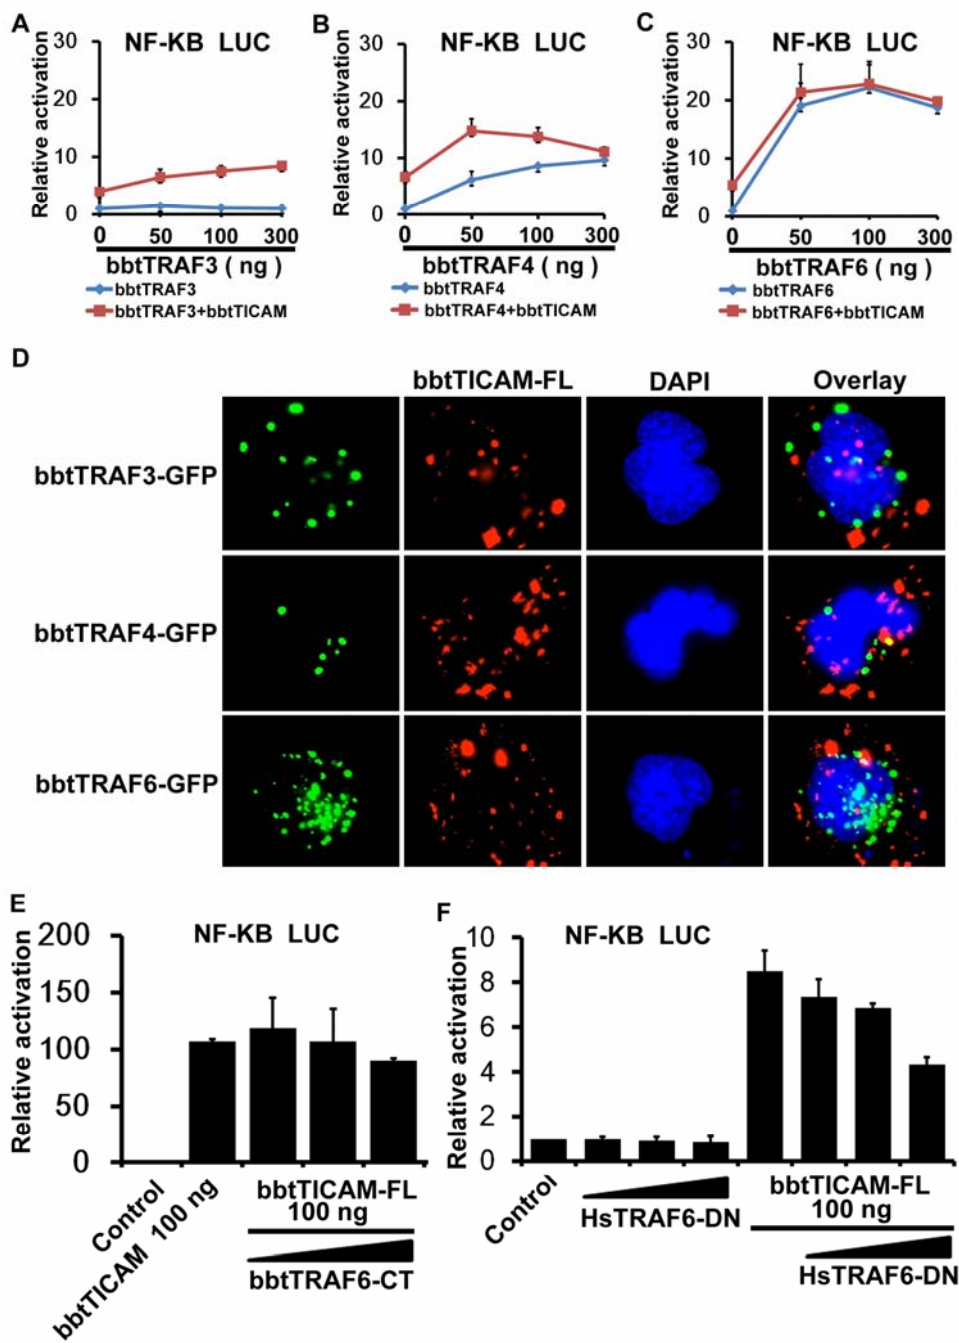

**Figure S5.** (A-C) BbtTICAM does not co-stimulate the NF- $\kappa$ B signal pathway with bbtTRAF3, 4, and 6. (D) bbtTICAM does not co-localize with bbtTRAF3, 4, and 6 in the transfected HeLa cells. (E) The TRAF domain of bbtTRAF6 does not affect the function of bbtTICAM. (F) HsTRAF6 (humanTRAF6)-DN attenuates the signal pathway induced by bbtTICAM-FL-WT in a dose-dependent manner. (bbtTRAF6-CT indicates the TRAF domain of bbtTRAF6, while HsTRAF6-DN indicates the TRAF domain of human TRAF6.)
